# Supplementary material for: Relationship between fill volume and transport in peritoneal dialysis
Source: bioRxiv or medRxiv preprint supplement (doi:10.1101/2024.01.31.24302046), 2024-01-31
Supplement: Supplementary file [file media-1.pdf]

# Relationship between fill volume and transport in peritoneal dialysis

Carl M. Öberg, MD, PhD <sup>1\*</sup>

<sup>1</sup> Department of Clinical Sciences Lund, Skåne University Hospital, Lund, SE-21185, SWEDEN.

## SUPPLEMENTAL MATERIAL

|                                   |         |
|-----------------------------------|---------|
| Supplemental Table 1 .....        | page 2  |
| Supplemental Table 2 .....        | page 3  |
| Supplemental Table 3 .....        | page 6  |
| Supplemental Table 4 .....        | page 8  |
| ISTAT-1 Calibration .....         | page 9  |
| Segmented linear regression ..... | page 10 |
| Mathematical theorems .....       | page 12 |
| References .....                  | page 14 |

**Supplemental Table 1 A.** Hemodynamic and routine lab parameters before and after dialysis.

| Parameter                             | Before dialysis    | After dialysis       |
|---------------------------------------|--------------------|----------------------|
| Mean arterial pressure, mmHg          | 119 (110 – 128)    | 103 (86 – 114) *     |
| Heart rate                            | 387 (360 – 402)    | 325 (310 – 345) ***  |
| Plasma sodium, mmol/L                 | 135 (135 – 136)    | 137 (137 – 138) ***  |
| Plasma potassium, mmol/L              | 4.5 (4.3 – 4.6)    | 4.3 (3.9 – 4.4) **   |
| Plasma total CO <sub>2</sub> , mmol/L | 26 (25 – 27)       | 24 (23 – 24) ***     |
| Plasma chloride, mmol/L               | 99 (98 – 100)      | 104 (103 – 105) ***  |
| Plasma ionized calcium, mmol/L        | 1.38 (1.34 – 1.40) | 1.40 (1.37 – 1.42) * |
| Blood hemoglobin, g/L                 | 143 (139 – 146)    | 136 (133 – 139) ***  |

Values are median (IQR). \*  $p < 0.05$ , \*\*  $p < 0.01$ , \*\*\*  $p < 0.001$ .

**Supplemental Table 1 B.** Treatment parameters.

| Parameter                                     | Value |
|-----------------------------------------------|-------|
| Dialysis fluid glucose, mmol/L <sup>a</sup>   | 83.2  |
| Dialysis fluid sodium, mmol/L <sup>a</sup>    | 134   |
| Dialysis fluid potassium, mmol/L <sup>a</sup> | 0     |
| Dialysis fluid chloride, mmol/L <sup>a</sup>  | 100.5 |
| Dialysis fluid lactate, mmol/L <sup>a</sup>   | 35    |
| Dialysis fluid calcium, mmol/L <sup>a</sup>   | 1.25  |
| Dialysis fluid magnesium, mmol/L <sup>a</sup> | 0.5   |
| Total fluid filled (group 1), mL              | 24    |
| Total fluid filled (group 2), mL              | 36    |
| Total fluid drained (group 1), mL             | 26.8  |
| Total fluid drained (group 2), mL             | 39.6  |

<sup>a</sup> Nominal values from the manufacturer (Balance, Fresenius Medical Care, Bad Homburg, Germany).

**Supplemental Table 2**

| Group                                     | Intra-peritoneal<br>volume (IPV) | UF rate                | Creatinine<br>MTAC     | Glucose<br>MTAC        | Potassium<br>MTAC      | tCO2<br>MTAC           |
|-------------------------------------------|----------------------------------|------------------------|------------------------|------------------------|------------------------|------------------------|
| Cumulative fill volume                    | mL                               | $\mu\text{L min}^{-1}$ | $\mu\text{L min}^{-1}$ | $\mu\text{L min}^{-1}$ | $\mu\text{L min}^{-1}$ | $\mu\text{L min}^{-1}$ |
| <b>First dwell phase</b>                  |                                  |                        |                        |                        |                        |                        |
| 8 mL                                      | 9.4 (9.3 – 9.6)                  | 15 (12 – 17)           | 149 (139 – 174)        | 108 (98 – 131)         | 319 (293 – 409)        | 191 (158 – 217)        |
| 12 mL                                     | 13.2 (12.6 – 13.3)               | 19 (18 – 24)           | 196 (155 – 221)        | 122 (88 – 135)         | 347 (333 – 412)        | 213 (180 – 228)        |
| <b>Second dwell phase</b>                 |                                  |                        |                        |                        |                        |                        |
| 8+8 mL                                    | 17.4 (17.3 – 17.6)               | 21 (20 – 26)           | 331 (238 – 476)        | 146 (125 – 165)        | 369 (342 – 459)        | 302 (260 – 335)        |
| 12+12 mL                                  | 25.2 (24.6 – 25.3)               | 32 (28 – 38)           | 570 (320 – 725)        | 194 (152 – 212)        | 505 (468 – 595)        | 375 (335 – 416)        |
| <b>Third dwell phase</b>                  |                                  |                        |                        |                        |                        |                        |
| 8+8+8 mL                                  | 25.4 (25.3 – 25.6)               | 17 (14 – 21)           | 609 (503 – 886)        | 210 (182 – 229)        | 469 (442 – 523)        | 336 (301 – 388)        |
| 12+12+12 mL                               | 37.2 (36.6 – 37.3)               | 27 (25 – 29)           | 482 (436 – 891)        | 242 (200 – 251)        | 613 (510 – 702)        | 512 (463 – 540)        |
| <b>Spearman rank test (IPV vs column)</b> |                                  |                        |                        |                        |                        |                        |

|                                               |         |         |         |         |         |
|-----------------------------------------------|---------|---------|---------|---------|---------|
| Correlation coefficient, $\rho$               | 0.45    | 0.77    | 0.69    | 0.69    | 0.89    |
| Correlation coefficient (regularized), $\rho$ | 0.53    | 0.90    | 0.81    | 0.91    | 0.91    |
| <i>P</i> -value                               | < 0.001 | < 0.001 | < 0.001 | < 0.001 | < 0.001 |

| Group                     | Urea<br>MTAC           | Calcium ion<br>MTAC    | Sodium<br>MTAC         | Chloride<br>MTAC       |
|---------------------------|------------------------|------------------------|------------------------|------------------------|
| Cumulative fill volume    | $\mu\text{L min}^{-1}$ | $\mu\text{L min}^{-1}$ | $\mu\text{L min}^{-1}$ | $\mu\text{L min}^{-1}$ |
| <b>First dwell phase</b>  |                        |                        |                        |                        |
| 8 mL                      | 200 (175 – 222)        | 175 (113 – 233)        | 140 (134 – 156)        | 118 (96 – 133)         |
| 12 mL                     | 208 (186 – 225)        | 222 (206 – 248)        | 170 (148 – 188)        | 123 (92 – 160)         |
| <b>Second dwell phase</b> |                        |                        |                        |                        |
| 8+8 mL                    | 331 (318 – 379)        | 358 (292 – 473)        | 248 (184 – 299)        | 192 (168 – 210)        |
| 12+12 mL                  | 430 (392 – 467)        | 423 (355 – 463)        | 297 (263 – 348)        | 233 (202 – 309)        |
| <b>Third dwell phase</b>  |                        |                        |                        |                        |
| 8+8+8 mL                  | 405 (375 – 479)        | 498 (403 – 736)        | 248 (184 – 299)        | 170 (139 – 201)        |

| 12+12+12 mL                                   | 543 (515 – 591) | 657 (532 – 716) | 297 (263 – 348) | 266 (222 – 294) |
|-----------------------------------------------|-----------------|-----------------|-----------------|-----------------|
| <b>Spearman rank test</b> (IPV vs column)     |                 |                 |                 |                 |
| Correlation coefficient (raw), $\rho$         | 0.90            | 0.87            | 0.66            | 0.69            |
| Correlation coefficient (regularized), $\rho$ | 0.91            | 0.91            | 0.86            | 0.88            |
| <i>P</i> -value                               | < 0.001         | < 0.001         | < 0.001         | < 0.001         |

**Supplemental Table 3.** Monte Carlo cross-validation results

|                          | Small solute diffusion capacity (MTAC) † |                    |                  | Osmotic conductance to glucose (OCG) |                    |                      |
|--------------------------|------------------------------------------|--------------------|------------------|--------------------------------------|--------------------|----------------------|
| Experimental data        | RMSE                                     | Break-point, mL    | MTAC ±<br>μL/min | RMSE                                 | Break-point, mL    | OCG ±<br>nL/min/mmHg |
| Square-Cube law          | 52.1 (42.0 – 57.5)                       | -                  | 120 (116 – 124)  | 9.1 (7.8 – 11.1)                     | -                  | 48 (47 – 48)         |
| Break-point model        | 50.8 (41.8 – 56.6)                       | 25.8 (25.2 – 26.4) | 149 (143 – 156)  | 9.0 (7.8 – 11.0)                     | 27.8 (25.7 – 30.7) | 61 (59 – 65)         |
| T-test, <i>p</i> -value  | < 0.001                                  |                    |                  | < 0.001                              |                    |                      |
| Clinical data            | RMSE                                     | Break-point, mL    | MTAC ±<br>mL/min | RMSE                                 | Break-point, mL    | OCG ±<br>μL/min/mmHg |
| Square-Cube law          | 0.22 (0.20 – 0.25)                       | -                  | 9.1 (8.9 – 9.3)  | 1.007 (0.84 – 1.17)                  | -                  | 2.8 (2.5 – 3.2)      |
| Break-point model        | 0.21 (0.19 – 0.24)                       | 2,286              | 9.5 (9.2 – 9.8)  | 1.005 (0.82 – 1.19)                  | 2,286              | 3.3 (2.9 – 3.7)      |
| T- test, <i>p</i> -value | < 0.001                                  |                    |                  | < 0.001                              |                    |                      |

RMSE, Root-mean-square error between model predictions and the validation datasets

†  $^{51}\text{Cr}$ -EDTA diffusion capacity (for experimental data), or creatinine diffusion capacity (clinical data)

‡ Value at the break-point or at 20/2000 mL (experimental data/clinical data).

**Supplemental Table 4.** Clinical scenarios simulated using the three-pore model

| <b>Regimen</b>                      | <b>Dwell time</b> | <b>Initial intra-peritoneal volume</b> | <b>D/P creatinine</b> | <b>Trans-peritoneal UF volume †</b> | <b>Net UF ‡</b> |
|-------------------------------------|-------------------|----------------------------------------|-----------------------|-------------------------------------|-----------------|
| Conventional PET using 2.3% glucose | <b>240</b>        | <b>2,300 mL</b>                        | <b>0.73</b>           | <b>296 mL</b>                       | <b>224 mL</b>   |
| Shorter PET using 2.3% glucose      | <b>190</b>        | <b>1,150 mL</b>                        | <b>0.74</b>           | <b>146 mL</b>                       | <b>89 mL</b>    |
| Shorter PET using 2.3% glucose      | <b>151</b>        | <b>575 mL</b>                          | <b>0.74</b>           | <b>73 mL</b>                        | <b>27 mL</b>    |

Dwell time for the shorter treatments were calculated by multiplying 240 min by  $(1,150/2,300)^{1/3}$  and  $(575/2,300)^{1/3}$ , respectively.

† Net water transport across the peritoneal membrane (does not include reabsorption rate/lymphatic flow)

‡ Net water transport including a fixed reabsorption rate/lymphatic flow of 0.3 mL/min



## Calibration of analytical methods using the iSTAT-1

### *Sodium and chloride*

Na<sup>+</sup> and Cl<sup>-</sup> were measured with the CHEM8 cassette (Abbott, Abbott Park, IL) utilizing ion-selective electrode potentiometry as described by the manufacturer. Bland-Altman analysis was performed using twenty-seven reference solutions, showing a variation coefficient (VC) of 0.8% for sodium and a VC 1.7% for chloride. There were small matrix effects for sodium when spiking with glucose as well as bicarbonate (both increased apparent sodium concentration). Correction was performed using:

$$f^{-1} = a + b \cdot \text{glu} + c \cdot \text{bic}$$

where **actual Na** =  $f \times$  **measured Na** [ $a = 0.9815$ ,  $b = 7.7 \cdot 10^{-5}$ ,  $c = 9.2 \cdot 10^{-4}$ ]. One can see that  $f$  equals  $\sim 1$  for a glucose concentration (normal) of 5 mmol/L and a bicarbonate concentration (normal) of 25 mmol/L, illustrating that the iSTAT-1 device is calibrated for blood plasma measurements. There were matrix effects for chloride, also for glucose and bicarbonate (both led to the apparent chloride concentration being lower than actual, again **actual Cl** =  $f \times$  **apparent Cl**:

$$f^{-1} = a + b \cdot \text{glu} + c \cdot \text{bic}$$

Here,  $a = 0.93$ ,  $b = -1.1 \cdot 10^{-4}$ ,  $c = -1.5 \cdot 10^{-3}$ .

### *Bicarbonate*

Bicarbonate was estimated on the basis of the Henderson-Hasselbach equation from pH,  $p\text{CO}_2$ , and ionic strength (Na<sup>+</sup>) measurements (according to the manufacturer, CHEM8 cassette), and calibrated to the International Federation of Clinical Chemistry (IFCC) TCO<sub>2</sub> reference method <sup>1</sup>. Bland-Altman analysis performed on the basis of twenty samples of standard fluids (reference) with known amounts of bicarbonate, lactate, and glucose concentrations revealed an imprecision (VC) of 7.5%. No matrix effects were detected for the included spike agents.

### *Calcium ion*

Calcium ion was measured using the CHEM8 cassette. Twenty-seven samples of standard fluids having a known calcium ion concentration of 1.25 mmol/L with known amounts of bicarbonate, lactate and glucose concentrations were analyzed. Bland-Altman analysis showed an imprecision (VC) of 4.1%. A significant matrix effect was identified only for glucose, **actual Ca** =  $f \times$  **apparent Ca**:

$$f^{-1} = a + b \cdot \text{glu}$$

Here,  $a = 0.74$  and  $b = 2.3 \cdot 10^{-4}$ .

## Segmented linear regression

The square-cube model and break-point models may be linearized:

$$\log y = \log \left( p_0 \left( \frac{v}{v_t} \right)^a \right) = a \log \frac{v}{v_t} + \log p_0$$

Here,  $y$  are the data points (i.e., OCG or MTAC values),  $v$  is the intra-peritoneal volume, and  $p_0$  is the value of the variable at the intra-peritoneal volume  $v_t$  set to 2,286 mL for the square cube model. For the square-cube model,  $a=2/3$ , and for the break-point model,  $a=2/3$  for the first segment (up to the break-point) and then  $a=1/3$ . The calculation of  $p_0$  for the square-cube model is straightforward

$$p_0 = e^{\frac{1}{N} \sum_{i=1}^N \log y_i - \frac{2}{3} \log \frac{v_i}{v_t}}$$

The root-mean-square error for the square-cube model is then calculated as

$$RMSE_0 = \frac{1}{N} \sum_{i=1}^N \left( \log y_i - \frac{2}{3} \log \frac{v_i}{v_t} - \log p_0 \right)^2$$

Since the data points are distributed over 6 different intra-peritoneal volumes (688 mL, 1200 mL, 1694 mL, 2286 mL, 2817 mL and 3329 mL), there are four possible break-point models (one for each interior volume). The calculations of the 4 parameters  $p_0$  is similar, but performed only over the segments  $A=\{688 \text{ mL}, 1200 \text{ mL}\}$ ,  $B=\{688 \text{ mL}, 1200 \text{ mL}, 1694 \text{ mL}\}$ ,  $C=\{688 \text{ mL}, 1200 \text{ mL}, 1694 \text{ mL}, 2286 \text{ mL}\}$ ,  $D=\{688 \text{ mL}, 1200 \text{ mL}, 1694 \text{ mL}, 2286 \text{ mL}, 2817 \text{ mL}\}$ , as follows

$$p_{0,A} = e^{\frac{1}{2} \sum_{i \in A} \log y_i - a \log \frac{v_i}{v_t}}$$

$$p_{0,B} = e^{\frac{1}{3} \sum_{i \in B} \log y_i - a \log \frac{v_i}{v_t}}$$

$$p_{0,C} = e^{\frac{1}{4} \sum_{i \in C} \log y_i - a \log \frac{v_i}{v_t}}$$

$$p_{0,D} = e^{\frac{1}{5} \sum_{i \in D} \log y_i - a \log \frac{v_i}{v_t}}$$

The root-mean-square errors are then calculated as follows

$$RMSE_A = \frac{1}{N} \left( \sum_{i \in A} \left( \log y_i - \frac{2}{3} \log \frac{v_i}{v_t} - \log p_0 \right)^2 + \sum_{i \notin A} \left( \log y_i - \frac{1}{3} \log \frac{v_i}{v_t} - \log p_0 \right)^2 \right)$$

$$RMSE_B = \frac{1}{N} \left( \sum_{i \in B} \left( \log y_i - \frac{2}{3} \log \frac{v_i}{v_t} - \log p_0 \right)^2 + \sum_{i \notin B} \left( \log y_i - \frac{1}{3} \log \frac{v_i}{v_t} - \log p_0 \right)^2 \right)$$

$$RMSE_C = \frac{1}{N} \left( \sum_{i \in C} \left( \log y_i - \frac{2}{3} \log \frac{v_i}{v_t} - \log p_0 \right)^2 + \sum_{i \notin C} \left( \log y_i - \frac{1}{3} \log \frac{v_i}{v_t} - \log p_0 \right)^2 \right)$$

$$RMSE_D = \frac{1}{N} \left( \sum_{i \in D} \left( \log y_i - \frac{2}{3} \log \frac{v_i}{v_t} - \log p_0 \right)^2 + \sum_{i \notin D} \left( \log y_i - \frac{1}{3} \log \frac{v_i}{v_t} - \log p_0 \right)^2 \right)$$

Lastly, root-mean-squared errors had an apparent right-tailed distribution much like the log-normal distribution of which the first moment is the geometric mean. T-tests were therefore carried out on log-transformed RMSE.

## Mathematical derivation of dwell-time and UF factor

**Theorem 1:** Assume that the intra-peritoneal volume is changed from  $V$  to  $V_{new}$ , and that the dialysate concentration  $D$  of a solute species follows an exponential model  $D(t)=D_0\exp(Vt/MTAC)$ . Then, the time it takes to reach a dialysate concentration ratio  $(D/D_0)$  using the new fill volume  $V_{new}$  is reduced/increased by the factor  $(V_{new}/V)^{1/3}$ .

*Proof:* The time  $T$  it takes to reach a dialysate concentration  $D$  from an initial concentration  $D_0$  is

$$T = \frac{V}{MTAC} \log \frac{D}{D_0}$$

Changing the volume from  $V$  to  $V_{new}$ , we get

$$T_{new} = \frac{V \left(\frac{V_{new}}{V}\right)}{MTAC \left(\frac{V_{new}}{V}\right)^{2/3}} \log \frac{D}{D_0} = \left(\frac{V_{new}}{V}\right)^{1/3} \frac{V}{MTAC} \log \frac{D}{D_0}$$

Thus, the time to reach  $D/D_0$  is reduced/increased by the factor  $(V_{new}/V)^{1/3}$ , meaning that when the fill volume is decreased the patient will appear “faster” and *vice versa*.

**Theorem 2:** In addition to the assumptions in Theorem 1, assume that the osmotic gradient is maintained by adjusting the dwell time by the factor  $(V_{new}/V)^{1/3}$ . Then, the UF-rate is reduced/increased by the factor  $(V_{new}/V)$ .

Using Ohm's law <sup>2</sup>, the UF rate is given by

$$UFR = OCG \cdot 19.3T(D_0 - D)/\log(D_0/D)$$

Again, changing the volume from  $V$  to  $V_{new}$  and also changing the time to achieve the same osmotic gradient  $(D/D_0)$ , we get

$$UFR = OCG \left( \frac{V_{new}}{V} \right)^{2/3} \cdot 19.3T \left( \frac{V_{new}}{V} \right)^{1/3} (D_0 - D) / \log(D_0/D) \leftrightarrow$$

$$UFR = \left( \frac{V_{new}}{V} \right) OCG \cdot 19.3T (D_0 - D) / \log(D_0/D)$$

Thus, changing the volume from  $V$  to  $V_{new}$ , the UF-rate is decreased by the factor  $(V_{new}/V)$  if the dwell time is also adjusted by the factor  $(V_{new}/V)^{1/3}$  to achieve a similar osmotic gradient.

## REFERENCES

1. Inc. APoC. *i-STAT 1 System Manual* Emergo Europe: The Hague, Netherlands, 2015.
2. Martus G, Bergling K, Simonsen O, *et al.* Novel Method for Osmotic Conductance to Glucose in Peritoneal Dialysis. *Kidney Int Rep* 2020; **5**: 1974-1981.
1. Inc. APoC. *i-STAT 1 System Manual* Emergo Europe: The Hague, Netherlands, 2015.
1. Hamer WJ, Wu YC. Osmotic coefficients and mean activity coefficients of uni-univalent electrolytes in water at 25° C. *Journal of Physical and Chemical Reference Data* 1972; **1**: 1047-1100.
2. Sarbar M, Covington A, Nuttall R, *et al.* The activity and osmotic coefficients of aqueous sodium bicarbonate solutions. *The Journal of Chemical Thermodynamics* 1982; **14**: 967-976.
3. Staples BR, Nuttall RL. The activity and osmotic coefficients of aqueous calcium chloride at 298.15 K. *Journal of Physical and Chemical Reference Data* 1977; **6**: 385-408.
4. Rard JA, Miller DG. Isopiestic determination of the osmotic and activity coefficients of aqueous magnesium chloride solutions at 25. degree. C. *Journal of Chemical and Engineering Data* 1981; **26**: 38-43.
5. Robinson RA, Stokes RH. Tables of osmotic and activity coefficients of electrolytes in aqueous solution at 25 C. *T Faraday Soc* 1949; **45**: 612-624.
6. Inc. APoC. *i-STAT 1 System Manual* Emergo Europe: The Hague, Netherlands, 2015.
